# Supplementary material for: Influence of defect distribution on the thermoelectric properties of FeNbSb based materials
Source: Royal Society of Chemistry journal article supplement (doi:10.1039/c8cp02071j), 2018-01-01
Supplement: c8cp02071j1.pdf [file c8cp02071j1.pdf]

Electronic Supplementary Material

**Influence of defect distribution on the thermoelectric  
properties of FeNbSb based materials**

Shuping Guo,<sup>a,b</sup> Kaishuai Yang,<sup>a,b</sup> Zhi Zeng,<sup>a,b</sup> and Yongsheng Zhang<sup>\*a,b</sup>

<sup>a</sup>Key Laboratory of Materials Physics, Institute of Solid State Physics, Chinese Academy of Sciences, Hefei 230031, China.

<sup>b</sup>Science Island Branch of Graduate School, University of Science and Technology of China, Hefei 230026, China.

\*E-mail: yshzhang@theory.issp.ac.cn

Table S1: Effective cluster interactions (ECI) (meV/atom) for  $\text{FeNb}_{1-x}\text{V}_x\text{Sb}$  and  $\text{FeNb}_{1-x}\text{Ti}_x\text{Sb}$ . The triplets are identify according to their longest side, the other two sides being the first-nearest neighbors.

| Cluster                                 | 1st pair | 2nd pair | 3rd pair | 4th pair | 1st triplet | 2nd triplet |
|-----------------------------------------|----------|----------|----------|----------|-------------|-------------|
| $\text{FeNb}_{1-x}\text{V}_x\text{Sb}$  | -3.1     | 0.8      | -0.4     | 0.1      | -0.4        | -0.1        |
| $\text{FeNb}_{1-x}\text{Ti}_x\text{Sb}$ | 0.3      | 0.6      | -0.8     | -0.4     | -1.6        | -0.4        |

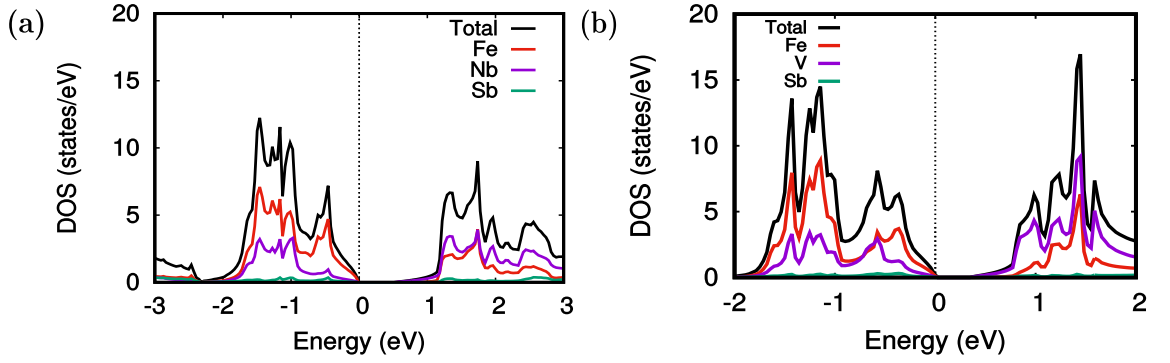

Fig. S1: The total and partial density of states of  $\text{FeNbSb}$  (a) and  $\text{FeVSb}$  (b).

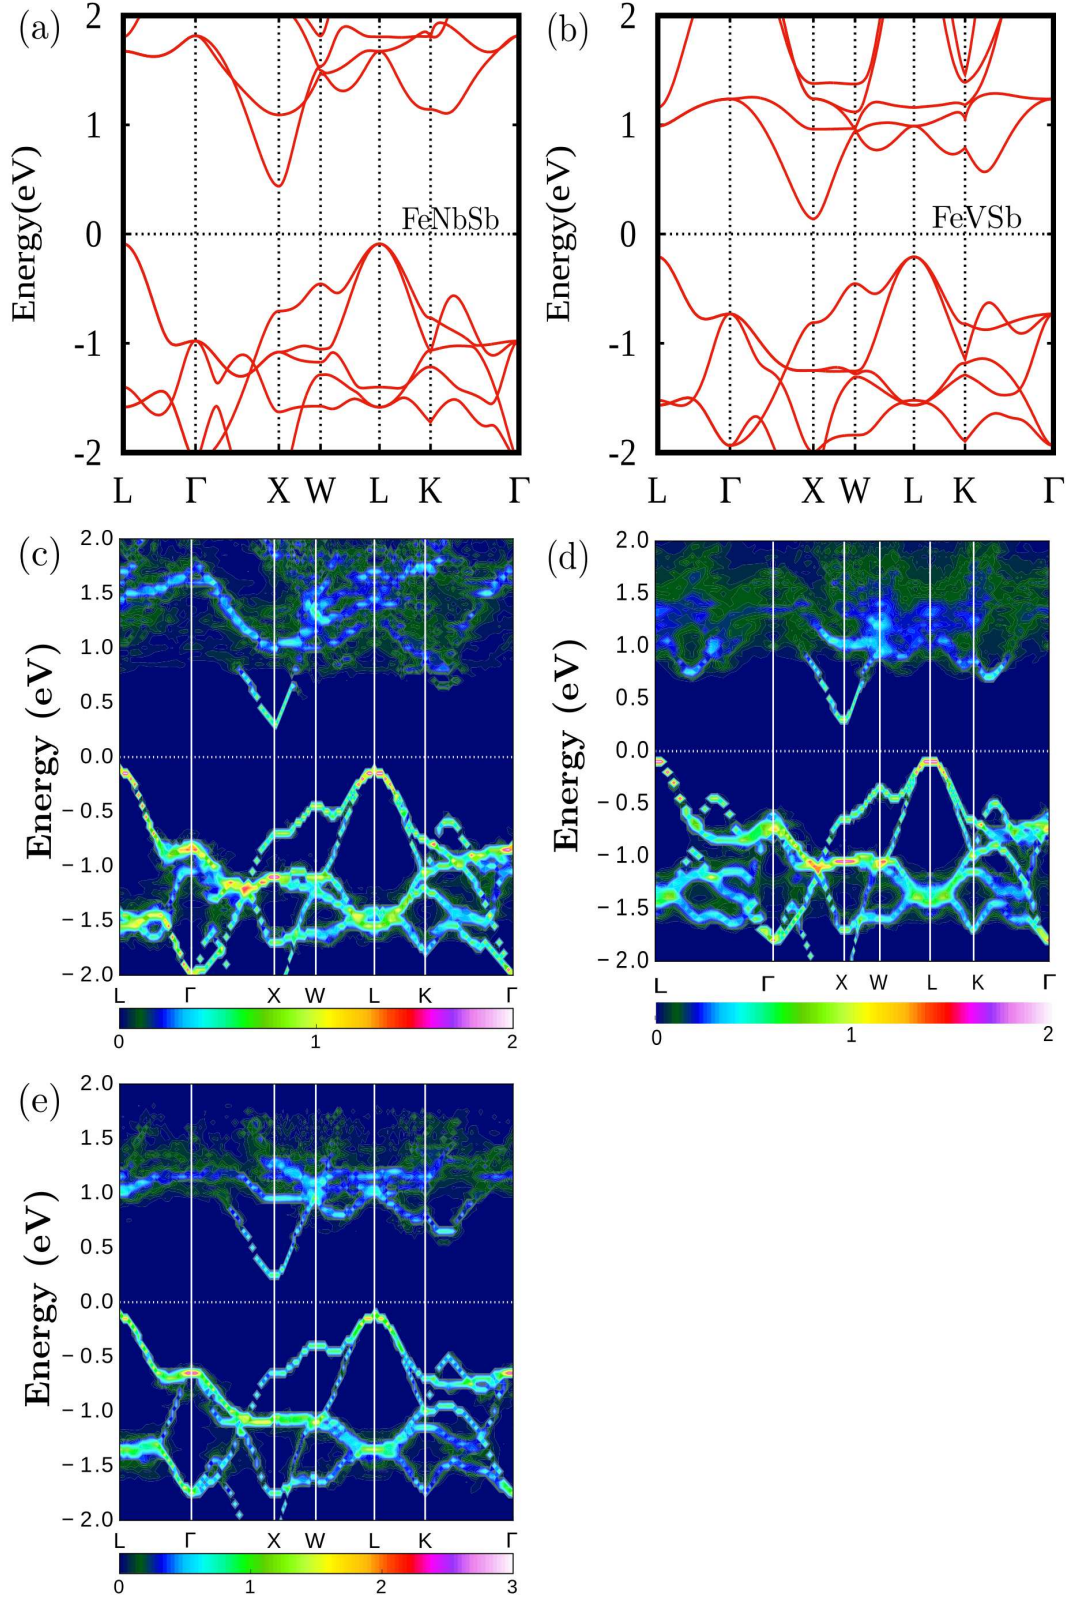

Fig. S2: The band structures of pristine compounds FeNbSb (a), FeVSb (b), and three FeNb<sub>1-x</sub>V<sub>x</sub>Sb SQSs with  $x = 25\%$  (c),  $50\%$  (d) and  $75\%$  (e) after band unfolding.

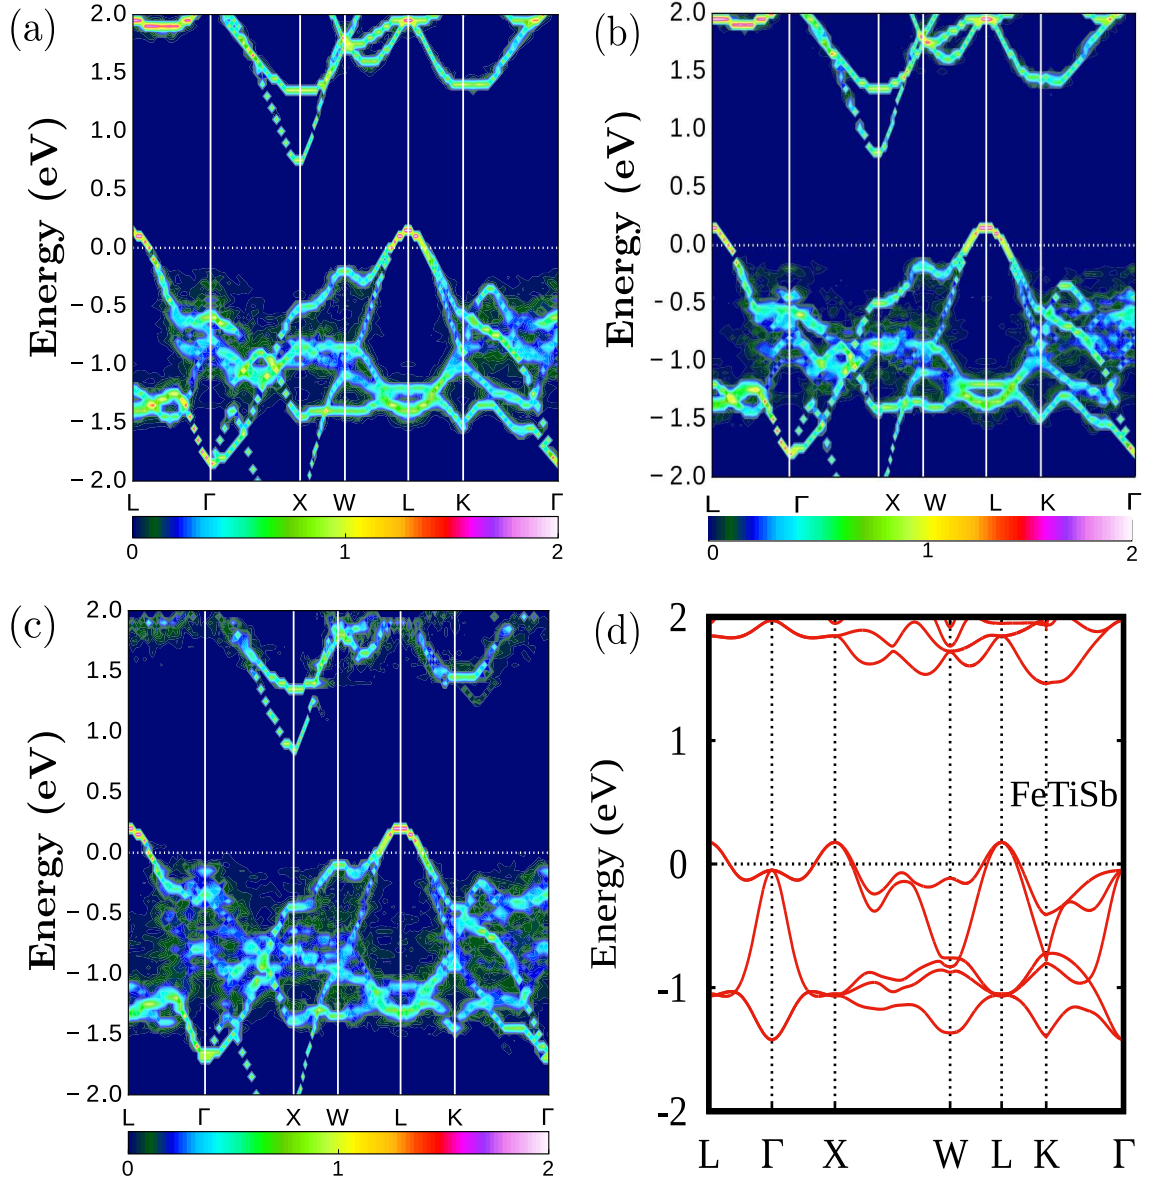

Fig. S3: The band structures of  $\text{FeNb}_{1-x}\text{Ti}_x\text{Sb}$ : two theoretically predicted ground states  $\text{Fe}_8\text{Nb}_7\text{Ti}_1\text{Sb}_8$  (a),  $\text{Fe}_6\text{Nb}_5\text{Ti}_1\text{Sb}_6$  (b) and one SQS with  $x = 25\%$  (c) after band unfolding and  $\text{FeTiSb}$  (d).
